# Supplementary material for: The first complete genome sequences of the acI lineage, the most abundant freshwater Actinobacteria, obtained by whole-genome-amplification of dilution-to-extinction cultures
Source: PubMed Central journal article supplement (PMC5301498; doi:10.1038/srep42252), 2017-02-10
Supplement: srep42252-s1.pdf [file srep42252-s1.pdf]

## Supplementary Information

The first complete genome sequences of the acI lineage, the most abundant freshwater *Actinobacteria*, obtained by whole-genome-amplification of dilution-to-extinction cultures

Ilnam Kang, Suhyun Kim, Md. Rashedul Islam, and Jang-Cheon Cho\*

Department of Biological Sciences, Inha University, Incheon 22212, Republic of Korea

Correspondence: Jang-Cheon Cho, Department of Biological Sciences, Inha University, Incheon 22212, Republic of Korea. E-mail: chojc@inha.ac.kr

**Supplementary Figure S1.** Revival and transfer cultures of the acI strains.

**Supplementary Figure S2.** Genome maps of the acI strains.

**Supplementary Figure S3.** Coverage variation across the complete acI genomes.

**Supplementary Table S1.** Lengths and coverages of the ten longest contigs obtained by SPAdes assembly

**Supplementary Table S2.** Chemicals added to the HTC media

**Supplementary Table S3.** List of strains used for the analysis of the COG category distribution

**Supplementary References**

## Supplementary Figures

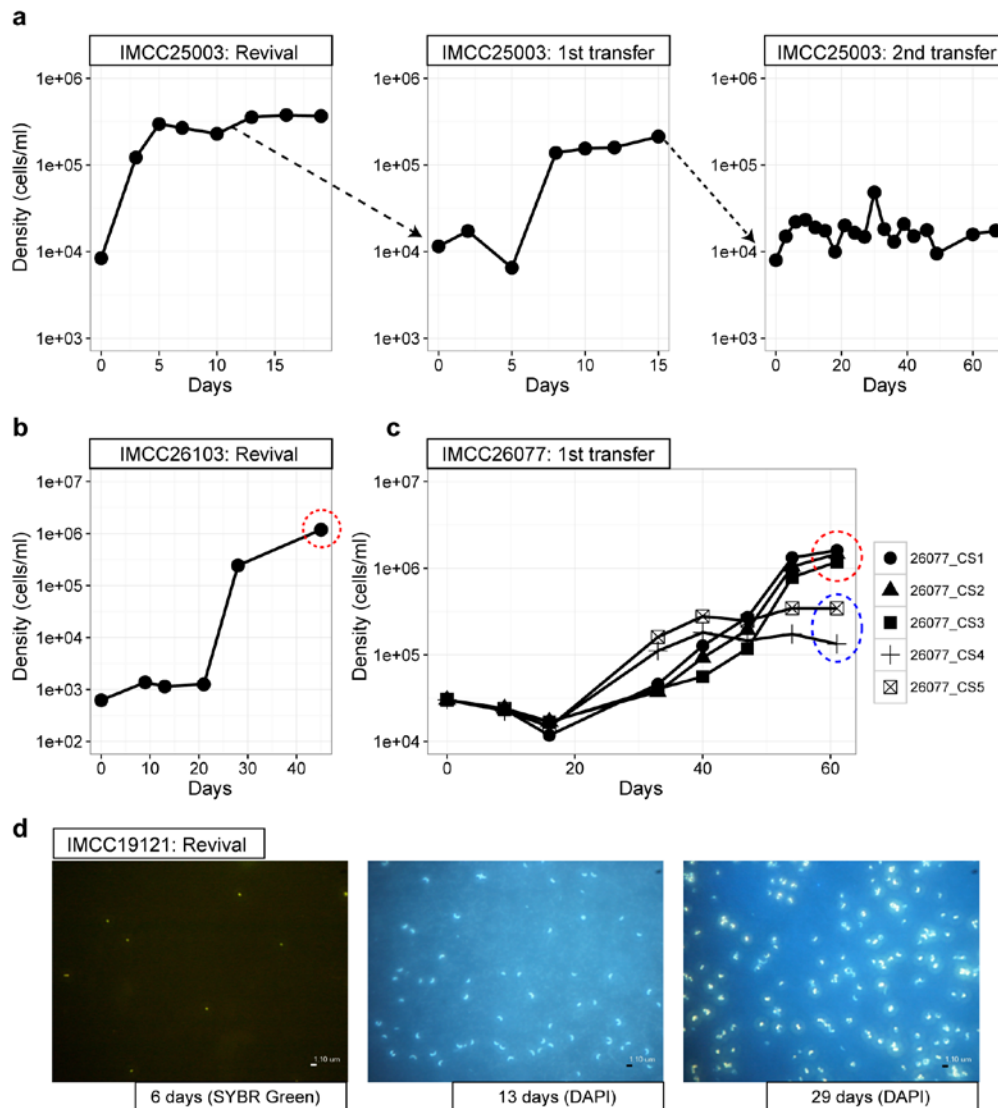

**Supplementary Figure S1.** Revival and transfer cultures of the acI strains. **(a)** Growth curves of IMCC25003. Dashed arrows indicate the transfer events. **(b)** Revival culture of IMCC26103. The culture surrounded by a red dashed circle was dominated by a bacterial strain other than IMCC26103. **(c)** Growth curves of IMCC26077 in media amended with different carbon sources. Cultures surrounded by red dashed circles were dominated by other bacterial strains. IMCC26077 dominated the cultures surrounded by blue dashed circles, but was outgrown by other bacterial strains in the next transfer. **(d)** Microscopic images of the IMCC19121 revival culture. IMCC19121 (small cocci) was dominant until 6 days after inoculation, and was gradually replaced by other bacterial strains (curved rod) during continued incubation. Scale bar (lower right), 1.1  $\mu\text{m}$ .

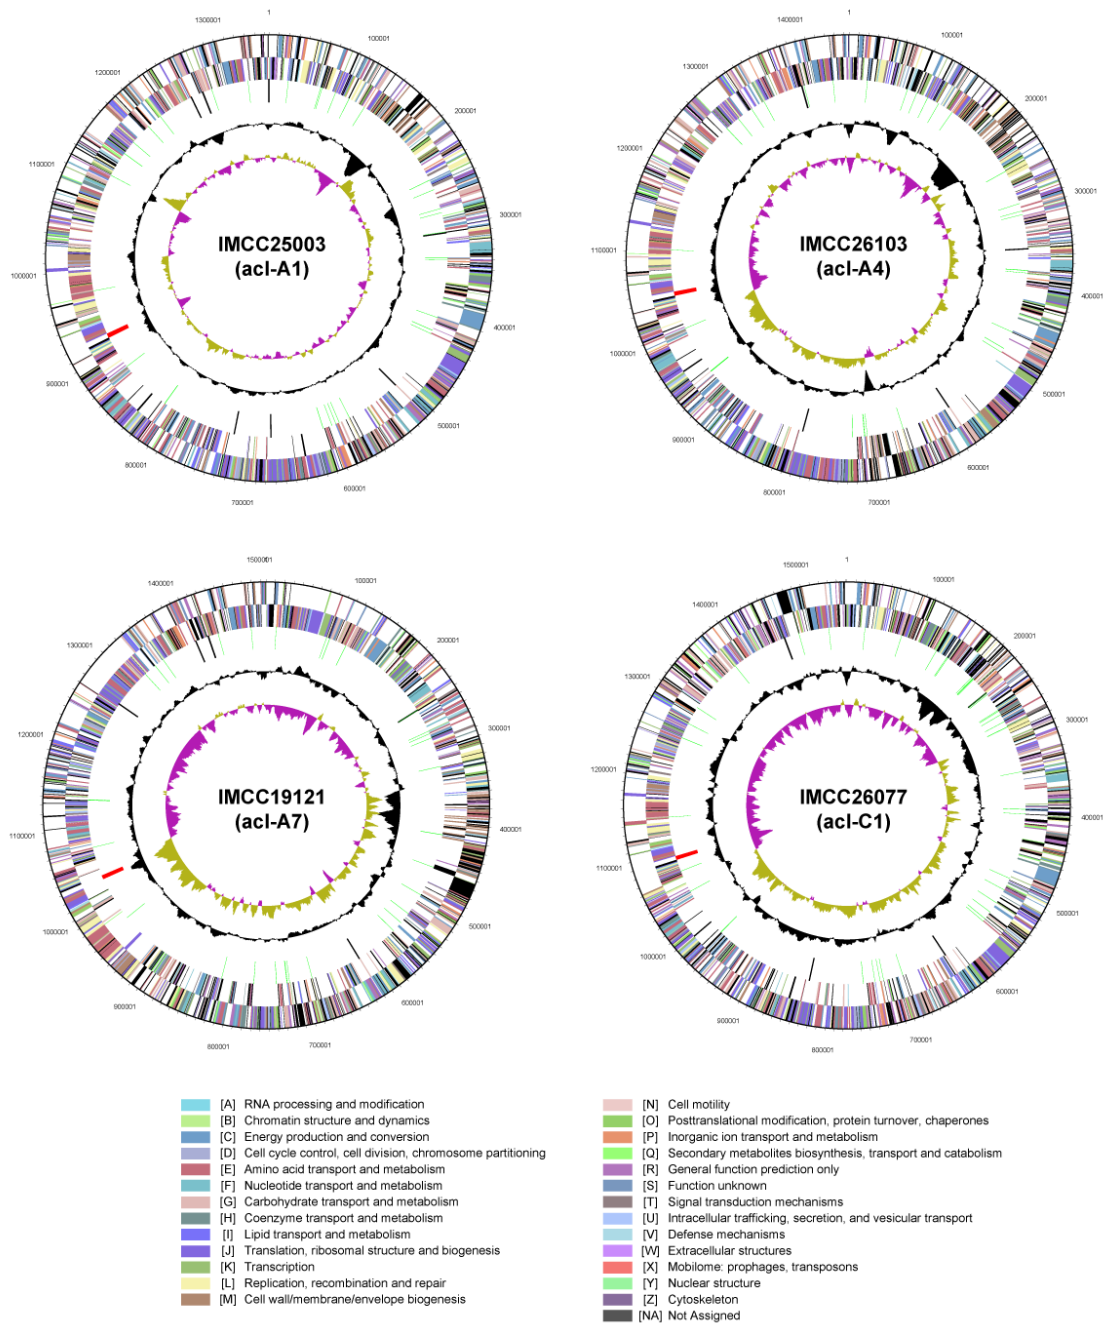

**Supplementary Figure S2.** Genome maps of the *aci* strains. From outside to the center: Genes on the forward strand (color by COG categories), genes on the reverse strand (color by COG categories), RNA genes (tRNAs green, rRNAs red, other RNAs black), GC content, and GC skew. Color designation of COG categories are shown at the bottom.

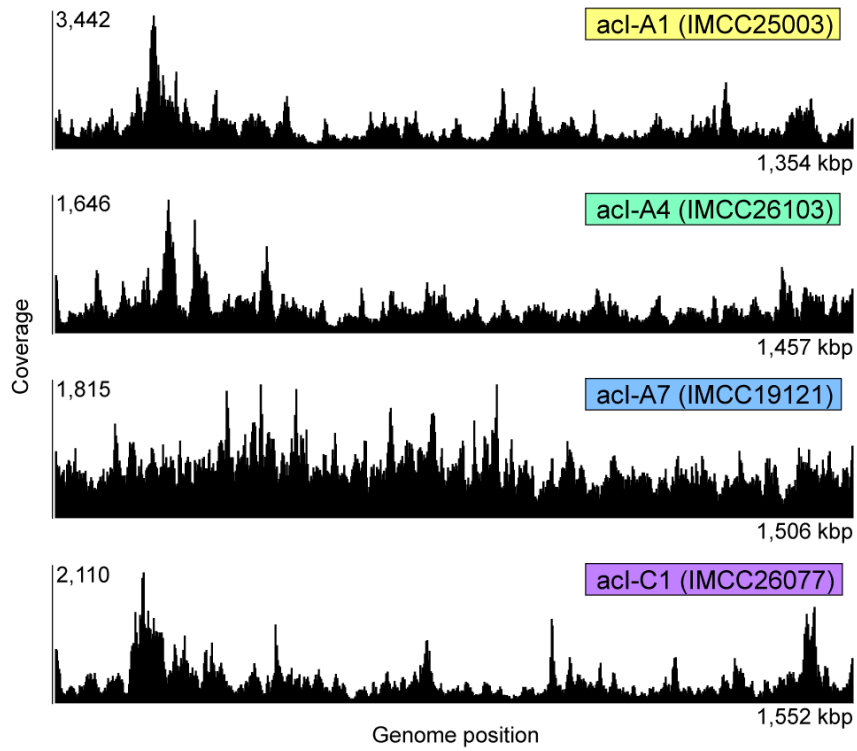

**Supplementary Figure S3.** Coverage variation across the complete acI genomes, calculated using a 25-bp window. Bar heights were normalized in each genome and do not correspond to actual values.

## Supplementary Tables

**Supplementary Table S1.** Lengths and coverages of the ten longest contigs obtained by SPAdes assembly

| IMCC25003   |          | IMCC26103   |          | IMCC19121   |          | IMCC26077   |          |
|-------------|----------|-------------|----------|-------------|----------|-------------|----------|
| Length (bp) | Coverage | Length (bp) | Coverage | Length (bp) | Coverage | Length (bp) | Coverage |
| 1,354,074   | 255.9    | 1,455,315   | 155.5    | 1,506,829   | 361.6    | 1,551,865   | 177.4    |
| 30,222      | 9.6      | 295,860     | 12.3     | 212,437     | 9.9      | 22,893      | 5.3      |
| 29,580      | 6.5      | 116,792     | 13.0     | 171,463     | 7.6      | 22,105      | 6.8      |
| 24,775      | 5.1      | 69,444      | 14.5     | 152,258     | 6.4      | 16,760      | 4.4      |
| 21,366      | 4.1      | 55,646      | 14.3     | 131,094     | 8.1      | 15,576      | 4.2      |
| 19,796      | 12.8     | 54,529      | 7.8      | 104,644     | 5.3      | 14,763      | 5.2      |
| 15,381      | 4.2      | 49,984      | 5.7      | 87,342      | 5.5      | 14,096      | 4.8      |
| 11,805      | 4.1      | 48,864      | 5.8      | 85,904      | 4.9      | 14,021      | 3.6      |
| 11,655      | 4.2      | 48,476      | 8.4      | 79,363      | 8.4      | 13,430      | 3.7      |
| 10,071      | 4.3      | 45,655      | 7.4      | 78,832      | 4.6      | 12,052      | 5.4      |

**Supplementary Table S2.** Chemicals added to the HTC media

| Chemical                        | Final concentration   |                       |
|---------------------------------|-----------------------|-----------------------|
|                                 | IMCC25003 & IMCC19121 | IMCC26103 & IMCC26077 |
| NH <sub>4</sub> Cl              | 10 μM                 | 10 μM                 |
| KH <sub>2</sub> PO <sub>4</sub> | 10 μM                 | 10 μM                 |
| Pyruvic acid                    | 50 μM                 | 50 μM                 |
| D-Glucose                       | 5 μM                  | 5 μM                  |
| <i>N</i> -Acetyl- D-glucosamine | 5 μM                  | 5 μM                  |
| Acetic acid                     | 5 μM                  | -                     |
| FeCl <sub>3</sub>               | 1 μM                  | -                     |
| D-Ribose                        | -                     | 5 μM                  |
| Methyl alcohol                  | -                     | 5 μM                  |
| Methionine                      | 1 μM                  | -                     |
| Glycine                         | 1 μM                  | -                     |
| Cysteine                        | 1 μM                  | -                     |
| Amino acids mixture*            | -                     | 100 nM, each          |
| Vitamin mixture <sup>†</sup>    | 1 ×                   | 1 ×                   |
| Trace metal <sup>‡</sup>        | -                     | 1 ×                   |

\*Mixture of 20 proteinogenic amino acids

<sup>†</sup>See Stingl *et al.* (2008) for a detailed composition.

<sup>‡</sup>See Carini *et al.* (2013) for a detailed composition.

**Supplementary Table S3.** List of strains used for the analysis of the COG category distribution

| taxon_oid  | Genome Name                                             | Group                   | Genome Size | Scaffold Count | GC (%) | Coding density (%) |
|------------|---------------------------------------------------------|-------------------------|-------------|----------------|--------|--------------------|
| 2602042019 | IMCC25003                                               | acI                     | 1353947     | 1              | 49     | 96.02              |
| 2602042020 | IMCC26103                                               | acI                     | 1456516     | 1              | 47     | 95.80              |
| 2606217181 | IMCC19121                                               | acI                     | 1506415     | 1              | 45     | 96.04              |
| 2602042021 | IMCC26077                                               | acI                     | 1551612     | 1              | 51     | 95.53              |
| 2602042091 | <i>Candidatus Aquiluna</i> sp. IMCC13023                | Luna1                   | 1361614     | 1              | 52     | 94.43              |
| 2504643007 | <i>Rhodoluna ladicola</i> MWH-Ta8                       | Luna1                   | 1430433     | 1              | 52     | 95.16              |
| 2663762675 | <i>Candidatus Methylopusillus planktonicus</i> MMS-2-53 | LD28                    | 1356411     | 1              | 37     | 94.72              |
| 2634166443 | <i>Polynucleobacter necessarius asymbioticus</i>        | <i>Polynucleobacter</i> | 2026292     | 1              | 45     | 93.56              |
| 2517572181 | <i>Polynucleobacter</i> sp. MWH-UH21B                   | <i>Polynucleobacter</i> | 2040808     | 1              | 45     | 94.08              |
| 2687453598 | <i>Polynucleobacter wuianus</i> QLW-P1FAT50C-4          | <i>Polynucleobacter</i> | 2232205     | 1              | 45     | 93.29              |
| 2522572097 | <i>Limnohabitans</i> sp. Rim28                          | <i>Limnohabitans</i>    | 3411710     | 73             | 59     | 92.41              |
| 2684622883 | <i>Limnohabitans</i> sp. Rim47                          | <i>Limnohabitans</i>    | 2955075     | 1              | 59     | 92.53              |
| 2623620844 | <i>Candidatus Pelagibacter ubique</i> SAR11 HTCC1002    | SAR11                   | 1327604     | 5              | 30     | 95.91              |
| 2623620681 | <i>Candidatus Pelagibacter ubique</i> SAR11 HTCC1062    | SAR11                   | 1308759     | 1              | 30     | 96.50              |
| 2503283017 | <i>Candidatus Pelagibacter</i> sp. HTCC7211             | SAR11                   | 1456888     | 1              | 29     | 96.70              |
| 2521172709 | Alphaproteobacterium sp. HIMB5                          | SAR11                   | 1343202     | 1              | 29     | 96.76              |
| 650716017  | <i>Candidatus Pelagibacter</i> sp. IMCC9063             | SAR11                   | 1284727     | 1              | 32     | 94.93              |
| 2503283019 | <i>Rickettsiales</i> sp. HIMB114                        | SAR11                   | 1237371     | 1              | 30     | 96.98              |
| 2623620328 | <i>Methylophilales</i> sp. HTCC2181                     | OM43                    | 1304428     | 3              | 38     | 95.15              |
| 2503283018 | Marine bacterium <i>Betaproteobacteria</i> HIMB624      | OM43                    | 1333209     | 1              | 35     | 96.43              |
| 644736322  | <i>Acidimicrobium ferrooxidans</i> ICP, DSM 10331       | <i>Actinobacteria</i>   | 2158157     | 1              | 68     | 91.53              |
| 639633001  | <i>Acidothermus cellulolyticus</i> 11B                  | <i>Actinobacteria</i>   | 2443540     | 1              | 67     | 90.22              |
| 2524614758 | <i>Actinobaculum urinale</i> DSM 15805                  | <i>Actinobacteria</i>   | 1920341     | 29             | 51     | 87.06              |
| 643886017  | <i>Actinomyces coleocanis</i> DSM 15436                 | <i>Actinobacteria</i>   | 1719346     | 40             | 50     | 90.81              |
| 2516493031 | <i>Actinopolyspora mortivallis</i> HS-1, DSM 44261      | <i>Actinobacteria</i>   | 4233350     | 1              | 69     | 86.58              |
| 2510065062 | <i>Actinospica robiniae</i> DSM 44927                   | <i>Actinobacteria</i>   | 9918887     | 1              | 70     | 87.59              |
| 2643221834 | <i>Aeromicrobium</i> sp. Leaf245                        | <i>Actinobacteria</i>   | 3465317     | 16             | 72     | 92.02              |
| 2541047096 | <i>Alloscardovia omnicoles</i> F0580                    | <i>Actinobacteria</i>   | 1789070     | 44             | 47     | 88.16              |
| 646564505  | <i>Arcanobacterium haemolyticum</i> CCM, DSM 20595      | <i>Actinobacteria</i>   | 1986154     | 1              | 53     | 90.51              |
| 2562617091 | <i>Atopobium vaginae</i> DSM 15829                      | <i>Actinobacteria</i>   | 1430526     | 6              | 43     | 88.74              |
| 643692008  | <i>Beutenbergia cavernae</i> HKI 0122, DSM 12333        | <i>Actinobacteria</i>   | 4669183     | 1              | 73     | 92.97              |
| 2524023203 | <i>Bifidobacterium magnum</i> DSM 20222                 | <i>Actinobacteria</i>   | 1825255     | 22             | 59     | 88.37              |
| 2600255077 | <i>Blastococcus</i> sp. AP3                             | <i>Actinobacteria</i>   | 3864252     | 78             | 73     | 91.18              |
| 2548877016 | <i>Brevibacterium massiliense</i> 5401308               | <i>Actinobacteria</i>   | 2349262     | 26             | 62     | 90.96              |
| 2565956803 | <i>Candidatus Microthrix parvicella</i> Bio17-1         | <i>Actinobacteria</i>   | 4202850     | 13             | 66     | 90.76              |
| 644736339  | <i>Catenulispora acidiphila</i> ID139908, DSM 44928     | <i>Actinobacteria</i>   | 10467782    | 1              | 70     | 89.49              |
| 2585427833 | <i>Cellulomonas</i> sp. HZM                             | <i>Actinobacteria</i>   | 3559280     | 77             | 73     | 92.07              |
| 2562617146 | <i>Collinsella intestinalis</i> DSM 13280               | <i>Actinobacteria</i>   | 1804297     | 55             | 62     | 89.60              |
| 2522572195 | <i>Conexibacter woesei</i> Iso977N                      | <i>Actinobacteria</i>   | 5695417     | 9              | 72     | 94.05              |
| 2558860387 | <i>Coriobacteriaceae</i> sp. BV3AC1                     | <i>Actinobacteria</i>   | 1801377     | 21             | 49     | 89.47              |
| 2515154055 | <i>Corynebacterium caspium</i> DSM 44850                | <i>Actinobacteria</i>   | 1843677     | 8              | 50     | 90.99              |
| 644736346  | <i>Cryptobacterium curtum</i> 12-3, DSM 15641           | <i>Actinobacteria</i>   | 1617804     | 1              | 51     | 88.83              |
| 2510065084 | <i>Cryptosporangium arvum</i> YU 629-21, DSM 44712      | <i>Actinobacteria</i>   | 9195993     | 1              | 72     | 91.62              |

| taxon_oid  | Genome Name                                                 | Group                 | Genome Size | Scaffold Count | GC (%) | Coding density (%) |
|------------|-------------------------------------------------------------|-----------------------|-------------|----------------|--------|--------------------|
| 2541047015 | <i>Dermabacter</i> sp. HFH0086                              | <i>Actinobacteria</i> | 2361288     | 8              | 63     | 91.43              |
| 2523533584 | <i>Dermatophilus congolensis</i> DSM 44180                  | <i>Actinobacteria</i> | 2623310     | 11             | 59     | 90.25              |
| 2547132114 | <i>Dietzia alimentaria</i> 72                               | <i>Actinobacteria</i> | 3352817     | 39             | 67     | 91.62              |
| 2600255000 | <i>Gardnerella vaginalis</i> 00703Dmash                     | <i>Actinobacteria</i> | 1490797     | 11             | 43     | 88.78              |
| 2524614582 | <i>Gordonia shandongensis</i> DSM 45094                     | <i>Actinobacteria</i> | 3330647     | 33             | 69     | 92.16              |
| 2516653079 | <i>Haloglycomyces albus</i> DSM 45210                       | <i>Actinobacteria</i> | 3535419     | 1              | 60     | 86.05              |
| 2545824624 | <i>Ilumatobacter coccineum</i> YM16-304                     | <i>Actinobacteria</i> | 4830181     | 1              | 67     | 93.12              |
| 2505679068 | <i>Isoptericola variabilis</i> 225                          | <i>Actinobacteria</i> | 3307740     | 1              | 74     | 92.73              |
| 2531839443 | <i>Janibacter hoylei</i> PVAS-1                             | <i>Actinobacteria</i> | 3139099     | 122            | 71     | 86.04              |
| 2509601042 | <i>Jiangella gansuensis</i> YIM 002, DSM 44835              | <i>Actinobacteria</i> | 5585780     | 1              | 71     | 91.37              |
| 644736376  | <i>Jonesia denitrificans</i> 55134, DSM 20603               | <i>Actinobacteria</i> | 2749646     | 1              | 58     | 91.83              |
| 640753031  | <i>Kineococcus radiotolerans</i> SRS30216                   | <i>Actinobacteria</i> | 4956672     | 3              | 74     | 91.06              |
| 644736380  | <i>Kytococcus sedentarius</i> 541, DSM 20547                | <i>Actinobacteria</i> | 2785024     | 1              | 72     | 91.28              |
| 2547132085 | <i>Mycobacterium bovis</i> BCG-Denmark TMC 1010, ATCC 35733 | <i>Actinobacteria</i> | 4255552     | 32             | 65     | 89.83              |
| 2524614512 | <i>Nakamurella lactea</i> DSM 19367                         | <i>Actinobacteria</i> | 5820860     | 27             | 69     | 91.63              |
| 2515154141 | <i>Nonomurea coxensis</i> DSM 45129                         | <i>Actinobacteria</i> | 8996452     | 101            | 72     | 90.88              |
| 2561511089 | <i>Paraoerskovia marina</i> DSM 21750                       | <i>Actinobacteria</i> | 2948319     | 11             | 71     | 92.88              |
| 649989980  | <i>Parascardovia denticolens</i> B3028, F0305               | <i>Actinobacteria</i> | 1891248     | 2              | 58     | 89.82              |
| 2524614558 | <i>Patulibacter americanus</i> DSM 16676                    | <i>Actinobacteria</i> | 4470560     | 32             | 74     | 91.11              |
| 2523533555 | <i>Propionimicrobium lymphophilum</i> DSM 4903              | <i>Actinobacteria</i> | 2035623     | 26             | 56     | 91.26              |
| 2524614761 | <i>Pseudoclavibacter soli</i> DSM 23366                     | <i>Actinobacteria</i> | 2223047     | 9              | 64     | 93.00              |
| 645058800  | <i>Rothia mucilaginosa</i> ATCC 25296                       | <i>Actinobacteria</i> | 2255158     | 25             | 60     | 82.97              |
| 2524614511 | <i>Ruania albidiflava</i> DSM 18029                         | <i>Actinobacteria</i> | 4174923     | 60             | 70     | 91.13              |
| 637000248  | <i>Rubroacter xylanophilus</i> DSM 9941                     | <i>Actinobacteria</i> | 3225748     | 1              | 70     | 93.63              |
| 2517093017 | <i>Saccharomonospora halophila</i> 8                        | <i>Actinobacteria</i> | 3685023     | 116            | 71     | 88.37              |
| 2517287023 | <i>Salinispora pacifica</i> DSM 45548                       | <i>Actinobacteria</i> | 5097790     | 2              | 70     | 89.13              |
| 647533207  | <i>Scardovia inopinata</i> F0304                            | <i>Actinobacteria</i> | 1804013     | 9              | 49     | 85.80              |
| 646564566  | <i>Segniliparus rotundus</i> CDC 1076, DSM 44985            | <i>Actinobacteria</i> | 3157527     | 1              | 67     | 91.29              |
| 2558860160 | <i>Solirubrobacterales</i> bacterium URHD0059               | <i>Actinobacteria</i> | 6572728     | 17             | 72     | 92.52              |
| 2516653049 | <i>Sporichthya polymorpha</i> DSM 43042                     | <i>Actinobacteria</i> | 5500153     | 1              | 71     | 92.38              |
| 2524614564 | <i>Streptomyces</i> sp. TAA040                              | <i>Actinobacteria</i> | 5311812     | 74             | 73     | 86.13              |
| 637000319  | <i>Thermobifida fusca</i> YX                                | <i>Actinobacteria</i> | 3642249     | 1              | 68     | 85.79              |
| 646564581  | <i>Thermobispora bispora</i> R51, DSM 43833                 | <i>Actinobacteria</i> | 4189976     | 1              | 72     | 84.55              |
| 646311963  | <i>Thermomonospora curvata</i> DSM 43183                    | <i>Actinobacteria</i> | 5639016     | 1              | 72     | 85.33              |
| 646564587  | <i>Tsakamurella paurometabola</i> 33, DSM 20162             | <i>Actinobacteria</i> | 4479724     | 2              | 68     | 93.46              |
| 2524614768 | <i>Yaniella halotolerans</i> DSM 15476                      | <i>Actinobacteria</i> | 2775456     | 6              | 56     | 91.64              |

## Supplementary References

- Carini P, Steindler L, Beszteri S, Giovannoni SJ. (2013). Nutrient requirements for growth of the extreme oligotroph '*Candidatus Pelagibacter ubique*' HTCC1062 on a defined medium. *ISME J* **7**: 592-602.
- Stingl U, Cho J-C, Foo W, Vergin K, Lanoil B, Giovannoni S. (2008). Dilution-to-extinction culturing of psychrotolerant planktonic bacteria from permanently ice-covered lakes in the McMurdo Dry Valleys, Antarctica. *Microb Ecol* **55**: 395-405.
